# Supplementary material
Source: Springer Nature journal article supplement (https://www.springermedizin.de/resource/supplementary/13012_2013_712_MOESM1_ESM.pdf/9630316)

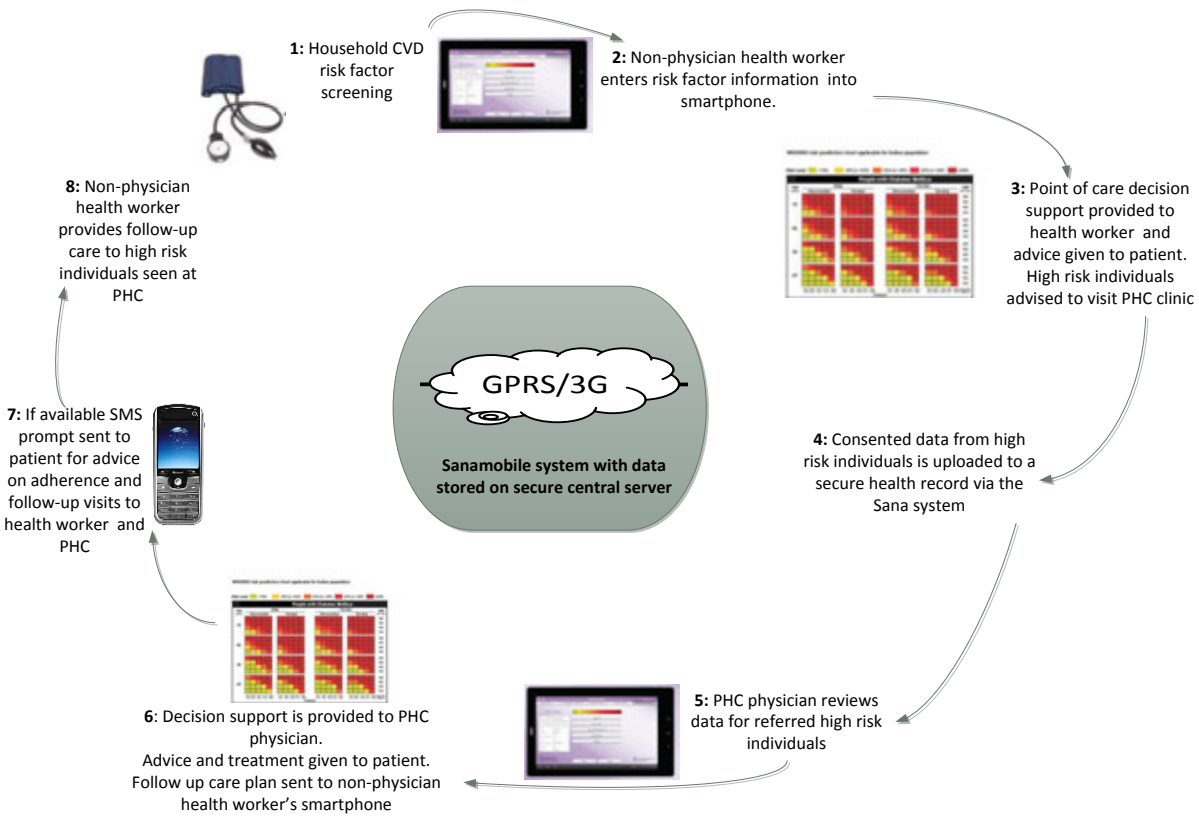

Supplement: MOESM1 [file 9630316]
